# Supplementary material for: The control of axillary meristem fate in the maizeramosapathway
Source: Oxford University Press journal article supplement (doi:10.1242/dev.051748), 2010-08-10
Supplement: dev051748tables1.pdf [file dev051748tables1.pdf]

**Table S1. Quantification of the average number of ear primary branches in *rel2;ra2* double mutants**

|                     | n  | Number of primary branches |
|---------------------|----|----------------------------|
| <i>rel2; ra2</i>    | 11 | 23.1 (5.4)*                |
| <i>rel2;+/ra2</i>   | 18 | 0                          |
| <i>+/rel2;ra2</i>   | 13 | 0.5 (0.4)*                 |
| <i>+/rel2;+/ra2</i> | 15 | 0                          |

Data are mean ( $\pm$ s.e.m.).  
\*t-test  $P=0.0002$ .
