# Supplementary material for: The control of axillary meristem fate in the maizeramosapathway
Source: Oxford University Press journal article supplement (doi:10.1242/dev.051748), 2010-08-10
Supplement: dev051748tables2.pdf [file dev051748tables2.pdf]

**Table S2. Quantification of the average number of ear branches in *rel2;ra1;ra2* triple mutants**

|                         | <i>n</i> | Number of primary branches | Number of secondary branches |
|-------------------------|----------|----------------------------|------------------------------|
| <i>rel2;ra1;ra2</i>     | 11       | 66.5 (6.7)*                | 57.3 (6.4)**                 |
| <i>rel2;+lra1;ra2</i>   | 16       | 47.9 (5.0)*                | 4.6 (1.1)**                  |
| <i>rel2;ra1;+lra2</i>   | 13       | 70.1 (4.4)                 | 0.1 (0.1)                    |
| <i>rel2;+lra1;+lra2</i> | 9        | 0                          | 0                            |

Data are mean ( $\pm$ s.e.m.).

\**t*-test  $P=0.033$ .

\*\**t*-test  $P<0.0001$ .
