# Supplementary material for: The control of axillary meristem fate in the maizeramosapathway
Source: Oxford University Press journal article supplement (doi:10.1242/dev.051748), 2010-08-10
Supplement: dev051748tables3.pdf [file dev051748tables3.pdf]

**Table S3. Quantification of the average density (number of branches/ear length) of ear primary branches in *rel2;ra1;ra2* triple mutants**

|                       | <i>n</i> | Primary branch density | Secondary branch density |
|-----------------------|----------|------------------------|--------------------------|
| <i>rel2;ra1;ra2</i>   | 18       | 4.88 (0.3)             | 4.83 (0.5)*              |
| <i>+/rel2;ra1;ra2</i> | 10       | 5.06 (0.4)             | 3.00 (0.8)*              |

Data are mean ( $\pm$ s.e.m.).

\**t*-test  $P=0.04$ .
