# Supplementary material for: The control of axillary meristem fate in the maizeramosapathway
Source: Oxford University Press journal article supplement (doi:10.1242/dev.051748), 2010-08-10
Supplement: dev051748tables4.pdf [file dev051748tables4.pdf]

**Table S4. List of new molecular markers developed for the positional cloning of *REL2***

| Markers      | Primers                                                           | Polymorphism              |
|--------------|-------------------------------------------------------------------|---------------------------|
| MAGIv4_94656 | For GTAAAATAGTATAGCTCTCAAATAACATG<br>Rev TCCCTTTAGCTGTCTGTCTTGTTG | Digest with <i>Af</i> III |
| MAGIv4_18077 | For CATACTTCAAATCGAGACATTGC<br>Rev ACAAACCTGTCTGAGAAGAACGTG       | Digest with <i>Hinf</i> I |
| MAGIv4_93926 | For GAGAGCTACTTCGACCTCAAGTCC<br>Rev TTGCGGTGGTTCTCGGAGGGGTC       | Digest with <i>Sal</i> I  |
