# Supplementary material for: The control of axillary meristem fate in the maizeramosapathway
Source: Oxford University Press journal article supplement (doi:10.1242/dev.051748), 2010-08-10
Supplement: dev051748tables5.pdf [file dev051748tables5.pdf]

**Table S5. List of primers used for genotyping**

| Markers     | Primers                                                   | Polymorphism                                          |
|-------------|-----------------------------------------------------------|-------------------------------------------------------|
| rel2-ref    | For TGTTCCCTTTAGCATCCAAC<br>Rev GTCAACTCTTGAGCCCAAGCAAGC  | Digest with <i>HindIII</i><br>Cuts rel2-ref sequence  |
| ra1-RS      | For AACCGTTTCTCCTCCGCATAGC<br>Rev TTATACAAAGCCAGTCATTCCAT | Digest with <i>AluI</i><br>Cuts wild-type sequence    |
| ra1-63.3359 | For CTTCACACCGTATTGCTGCTC<br>Rev ACTGCACGTACCCATTGTAGC    | Digest with <i>SnaBI</i><br>Cuts ra1-63.3359 sequence |
| ra2-ref     | For GACCAAGCTGCTGAACGAG<br>Rev CGTAGACGGGGTCCTTGAC        | Size difference<br>ra2-ref has an 8bp insertion       |
