# Supplementary material for: The control of axillary meristem fate in the maizeramosapathway
Source: Oxford University Press journal article supplement (doi:10.1242/dev.051748), 2010-08-10
Supplement: dev051748tables6.pdf [file dev051748tables6.pdf]

**Table S6. List of primers used for expression analysis by RT-PCR**

| Gene        | Primers                                                    |
|-------------|------------------------------------------------------------|
| <i>REL2</i> | For CTCTTGGTTTACGCTGGGGTTC<br>Rev ACTTAGAGCGAGCGATGTCAC    |
| <i>KN1</i>  | For CTAATGGTTCCAGGTGTCTGAAG<br>Rev TGTCAGGTTACGATAACAATACG |
